# Supplementary figures and images for: Kinetic and thermodynamic studies on methylene blue biosorption using corn-husk
Source: Royal Society of Chemistry journal article supplement (doi:10.1039/c4ra10504d), 2014-01-01

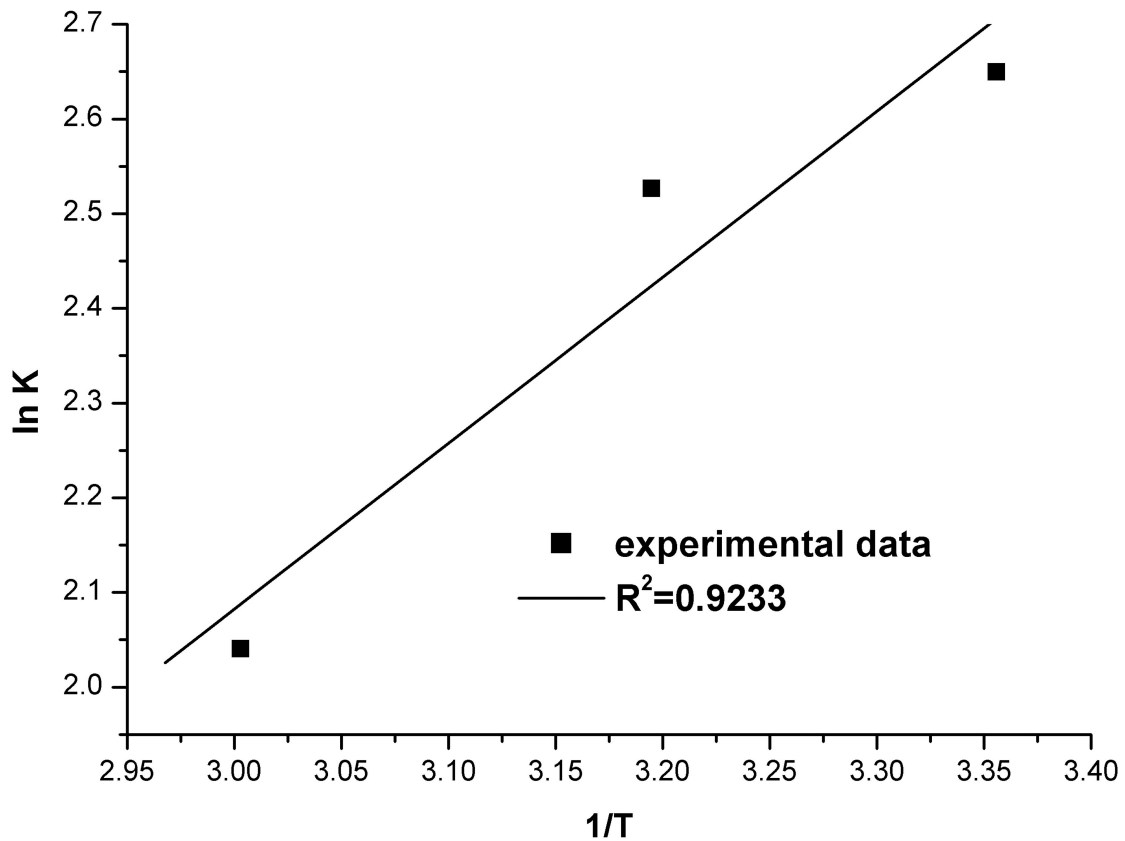

Supplement: c4ra10504d2.pdf [file c4ra10504d2.pdf]

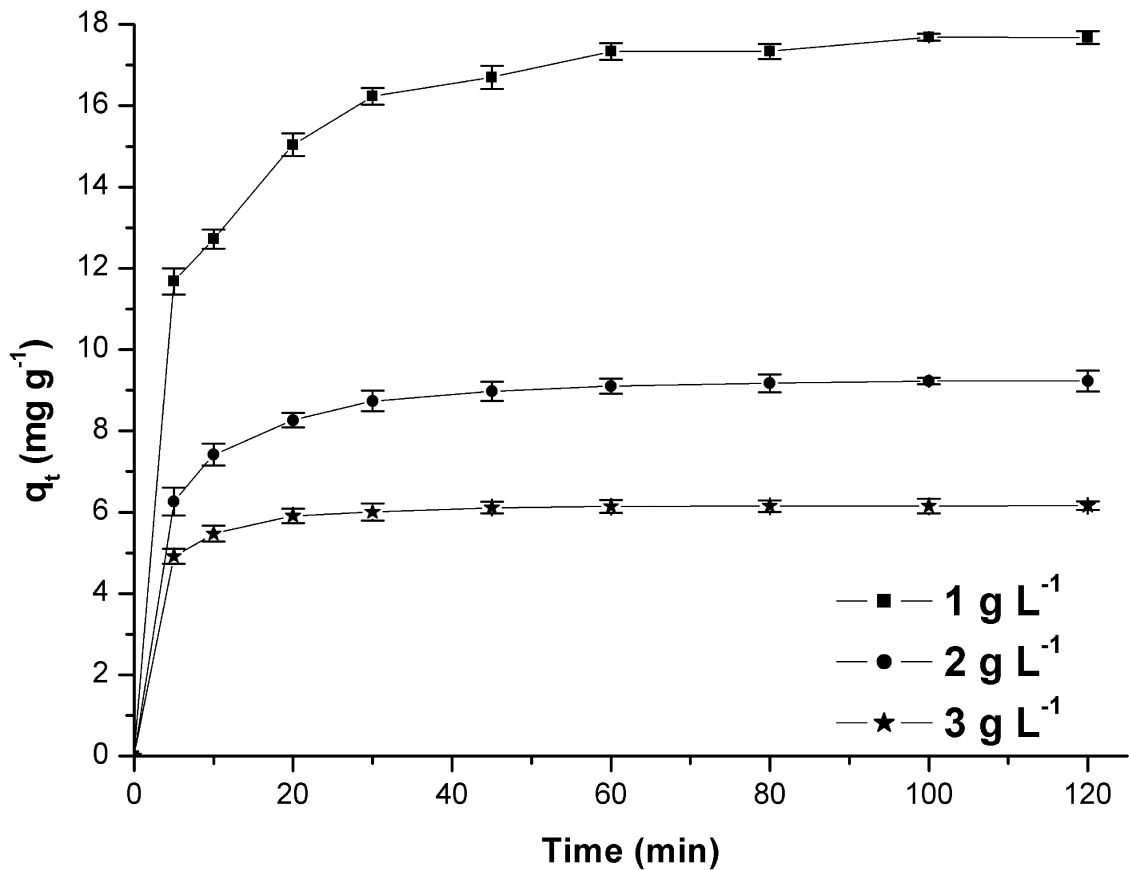

Supplement: c4ra10504d3.pdf [file c4ra10504d3.pdf]

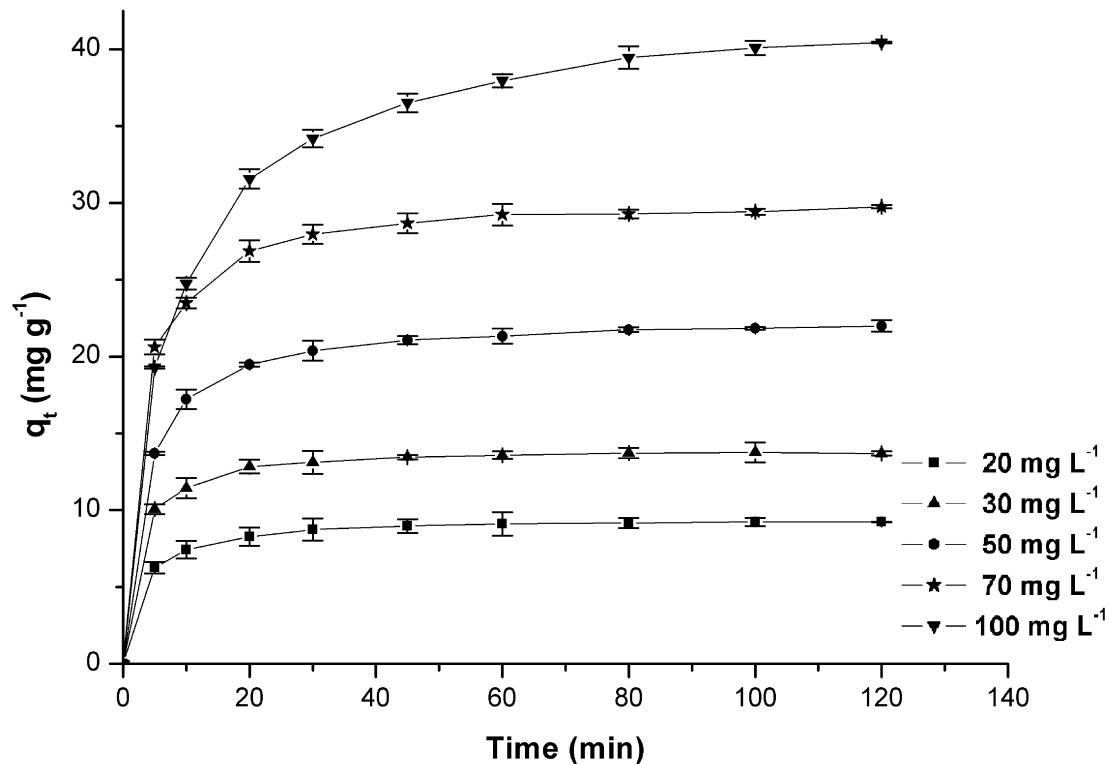

Supplement: c4ra10504d4.pdf [file c4ra10504d4.pdf]

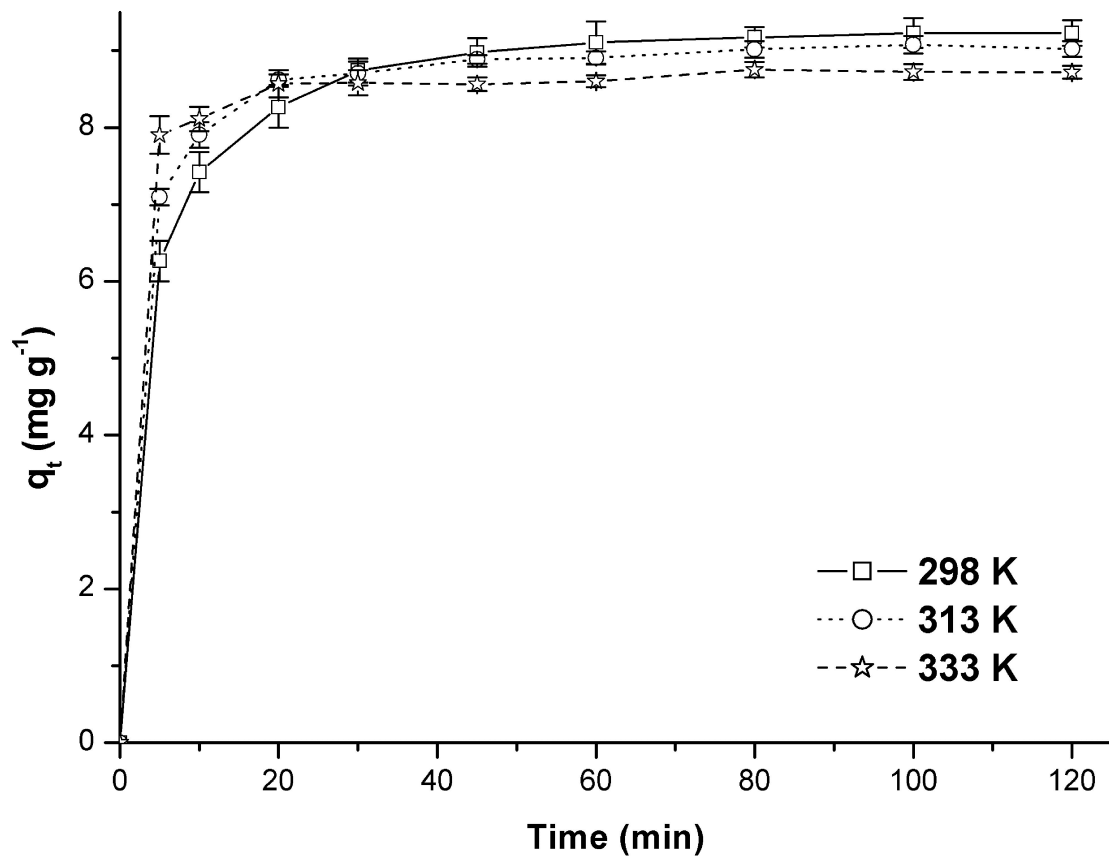

Supplement: c4ra10504d5.pdf [file c4ra10504d5.pdf]

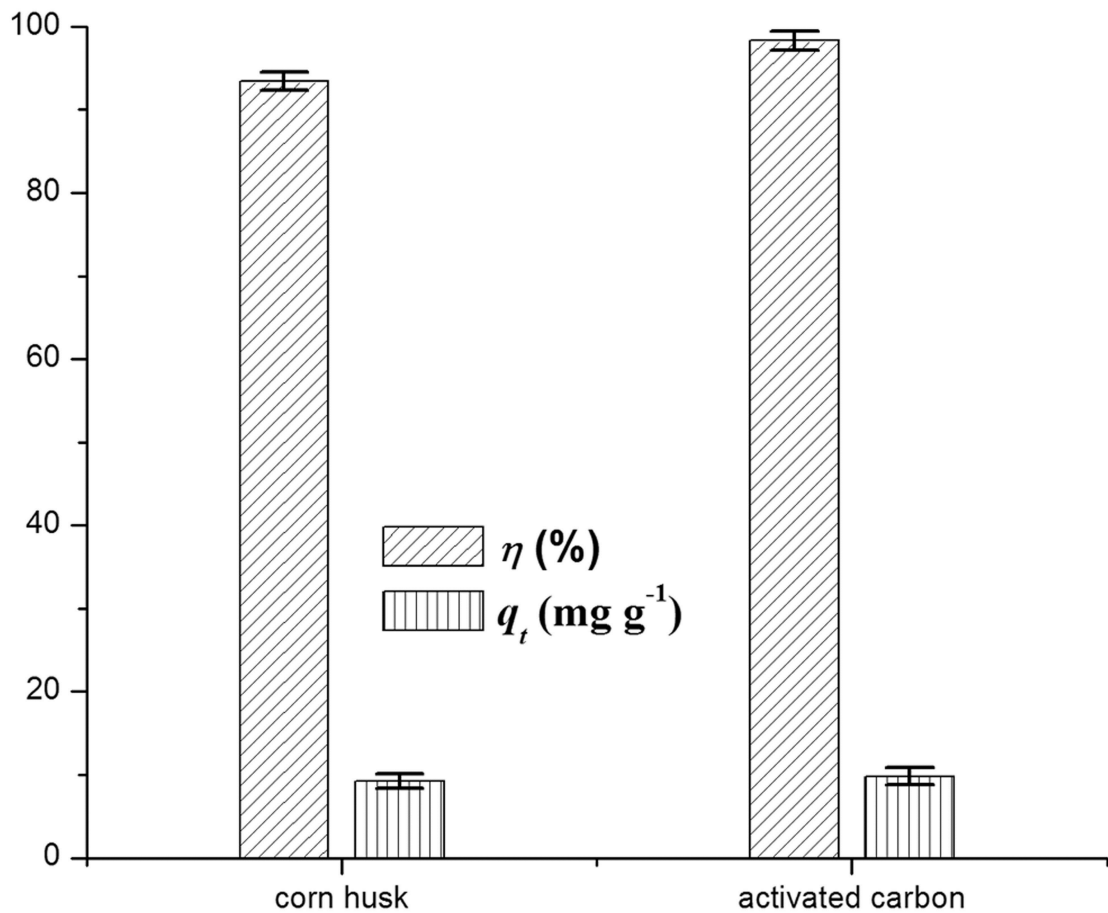

Supplement: c4ra10504d6.pdf [file c4ra10504d6.pdf]

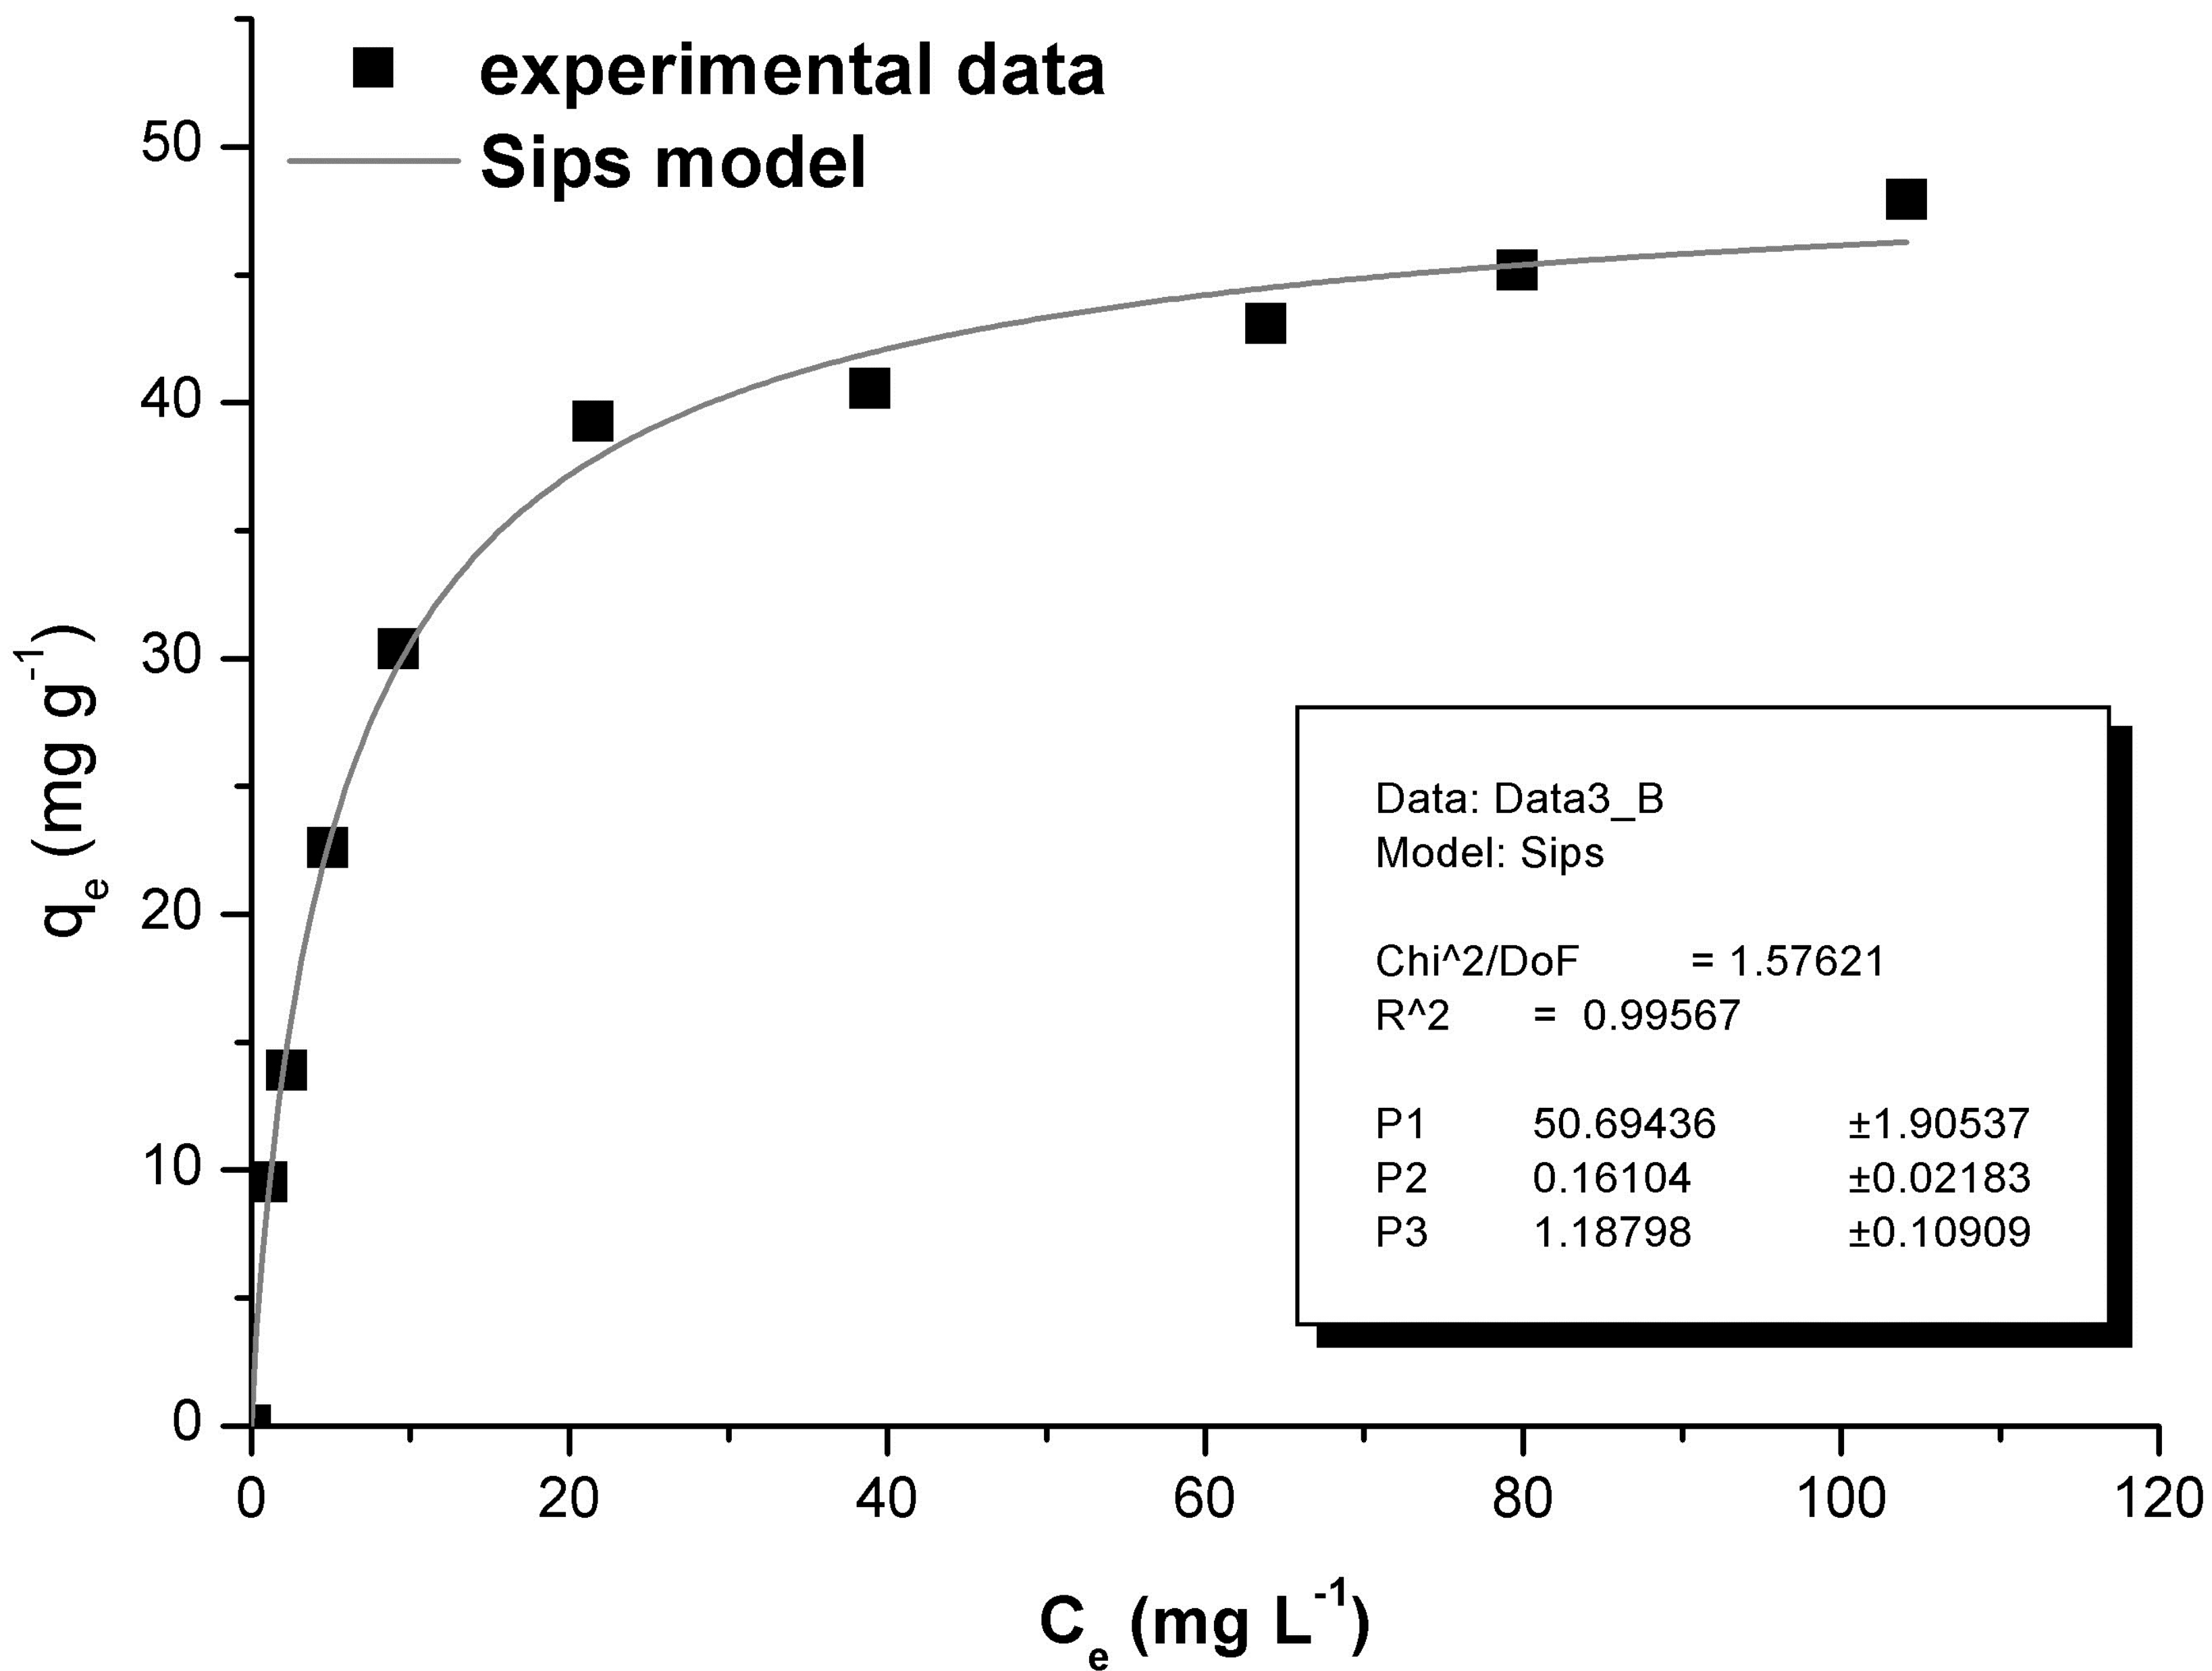

Supplement: c4ra10504d7.pdf [file c4ra10504d7.pdf]
